# Supplementary material for: One-step chromatographic purification of K, Ca, and Sr from geological samples for high precision stable and radiogenic isotope analysis by MC-ICP-MS
Source: Royal Society of Chemistry journal article supplement (doi:10.1039/d0ja00467g), 2021-01-01
Supplement: d0ja00467g1.pdf [file d0ja00467g1.pdf]

## Supporting Information for:

### **One-step chromatographic purification of K, Ca, and Sr from geological samples for high precision stable and radiogenic isotope analysis by MC-ICP-MS**

Xiaoqiang Li, Guilin Han\*

Institute of Earth Sciences, China University of Geosciences (Beijing), Beijing 100083, China

\*Corresponding author E-mail: [hanguilin@cugb.edu.cn](mailto:hanguilin@cugb.edu.cn).

Xiaoqiang Li: [xiaoqli@cugb.edu.cn](mailto:xiaoqli@cugb.edu.cn).

### **Contents of this file**

Figures S1

Tables S1–S3

### **Introduction**

This supporting information provides the detailed description of methodology, figures, and tables to support the results presented in the main text.

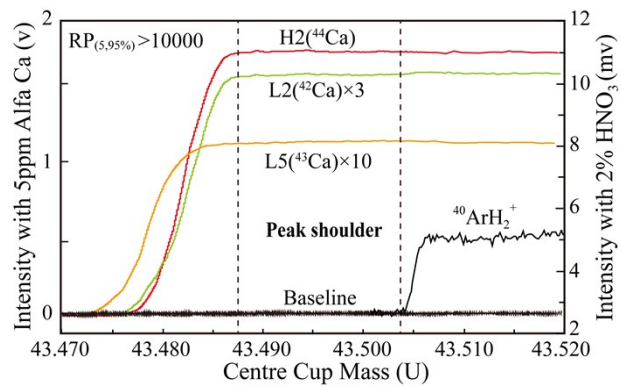

**Fig. S1.** A peak scan of the Alfa 5 ppm Ca solution left and 2 vol% HNO<sub>3</sub> right under high-resolution model on a Nu Plasma 3.

1 **Table S1.** Potential elemental and molecular isobaric interferences affecting K-Ca  
 2 Isotopic Measurements.<sup>31</sup>

| Isotope                       | Interference (required resolution)                                                                                                                                                                                                                                                                                                                                                                                                                                                                                                                                 |
|-------------------------------|--------------------------------------------------------------------------------------------------------------------------------------------------------------------------------------------------------------------------------------------------------------------------------------------------------------------------------------------------------------------------------------------------------------------------------------------------------------------------------------------------------------------------------------------------------------------|
| <sup>39</sup> K <sup>+</sup>  | <sup>23</sup> Na <sup>16</sup> O <sup>+</sup> (1858); <sup>38</sup> ArH <sup>+</sup> (5688)                                                                                                                                                                                                                                                                                                                                                                                                                                                                        |
| <sup>41</sup> K <sup>+</sup>  | <sup>25</sup> Mg <sup>16</sup> O <sup>+</sup> (2165); <sup>23</sup> Na <sup>18</sup> O <sup>+</sup> (1511); <sup>40</sup> ArH <sup>+</sup> (4888); <sup>40</sup> CaH <sup>+</sup> (4768)                                                                                                                                                                                                                                                                                                                                                                           |
| <sup>42</sup> Ca <sup>+</sup> | <sup>84</sup> Kr <sup>++</sup> (14627); <sup>84</sup> Sr <sup>++</sup> (21993); <sup>41</sup> KH <sup>+</sup> (3805); <sup>30</sup> Si <sup>12</sup> C <sup>+</sup> (2770); <sup>26</sup> Mg <sup>16</sup> O <sup>+</sup> (2221);<br><sup>40</sup> ArH <sub>2</sub> <sup>+</sup> (2161); <sup>40</sup> CaH <sub>2</sub> <sup>+</sup> (2139); <sup>28</sup> Si <sup>14</sup> N <sup>+</sup> (1962); <sup>24</sup> Mg <sup>18</sup> O <sup>+</sup> (1640); <sup>25</sup> Mg <sup>16</sup> OH <sup>+</sup> (1401);<br><sup>14</sup> N <sub>3</sub> <sup>+</sup> (829) |
| <sup>43</sup> Ca <sup>+</sup> | <sup>86</sup> Sr <sup>++</sup> (10392); <sup>86</sup> Kr <sup>++</sup> (12404); <sup>42</sup> CaH <sup>+</sup> (5596); <sup>27</sup> Al <sup>16</sup> O <sup>+</sup> (2429); <sup>31</sup> P <sup>12</sup> C <sup>+</sup> (2865);<br><sup>26</sup> Mg <sup>16</sup> OH <sup>+</sup> (1617); <sup>14</sup> N <sub>3</sub> H <sup>+</sup> (737)                                                                                                                                                                                                                      |
| <sup>44</sup> Ca <sup>+</sup> | <sup>88</sup> Sr <sup>++</sup> (16448); <sup>43</sup> CaH <sup>+</sup> (3956); <sup>28</sup> Si <sup>16</sup> O <sup>+</sup> (2687); <sup>32</sup> S <sup>12</sup> C <sup>+</sup> (2650); <sup>30</sup> Si <sup>14</sup> N <sup>+</sup> (2058);<br><sup>26</sup> Mg <sup>18</sup> O <sup>+</sup> (1673); <sup>27</sup> Al <sup>16</sup> OH <sup>+</sup> (1526); <sup>12</sup> C <sup>16</sup> O <sub>2</sub> <sup>+</sup> (1280); <sup>14</sup> N <sub>2</sub> <sup>16</sup> O <sup>+</sup> (964)                                                                  |

**Table S2.** Testing the influences of double charge Sr on Ca isotopic analysis.

| Ca/Sr  | <sup>44</sup> Ca(V) | <sup>88</sup> Sr(mV) | <sup>43.5</sup> Sr(mV) | $\delta^{44/42}\text{Ca}$ | 2SD  | N | $\delta^{43/42}\text{Ca}$ | 2SD  | N |
|--------|---------------------|----------------------|------------------------|---------------------------|------|---|---------------------------|------|---|
| 100000 | 1.51                | 2.6                  | 0.1                    | 0.03                      | 0.05 | 5 | 0.02                      | 0.06 | 5 |
| 50000  | 1.51                | 3.6                  | 0.2                    | 0.07                      | 0.04 | 5 | 0.13                      | 0.07 | 5 |
| 20000  | 1.52                | 5.1                  | 0.2                    | 0.11                      | 0.05 | 5 | 0.38                      | 0.17 | 5 |
| 10000  | 1.52                | 11.6                 | 0.2                    | 0.21                      | 0.06 | 5 | 0.58                      | 0.18 | 5 |
| 7000   | 1.51                | 15.9                 | 0.2                    | 0.44                      | 0.05 | 5 | 0.83                      | 0.13 | 5 |
| 5000   | 1.52                | 22.1                 | 0.3                    | 0.53                      | 0.07 | 5 | 1.05                      | 0.17 | 5 |
| 3000   | 1.51                | 35.6                 | 0.2                    | 0.91                      | 0.10 | 5 | 1.70                      | 0.15 | 5 |
| 1000   | 1.51                | 103.1                | 0.3                    | 2.89                      | 0.27 | 5 | 5.27                      | 0.47 | 5 |

**Table S3.** Ca isotopic composition of geological standards in this study and in the literature.

| Sample                      | Reference  | Method <sup>a</sup>  | Ca<br>(wt.%) | Ca/Sr after<br>purification | $\delta^{44/42}\text{Ca}$ | 2SD <sup>b</sup> | N <sup>c</sup> |
|-----------------------------|------------|----------------------|--------------|-----------------------------|---------------------------|------------------|----------------|
| SRM 915b                    | This study |                      | 55.9         | 162000                      | 0.34                      | 0.05             | 20             |
|                             | 1          | SSB, MC-ICP-MS       |              |                             | 0.36                      | 0.07             |                |
|                             | 2          | SSB, MC-ICP-MS       |              |                             | 0.36                      | 0.05             | 67             |
|                             | 3          | SSB, MC-ICP-MS       |              |                             | 0.36                      | 0.01             | 3              |
|                             | 4          | SSB, MC-ICP-MS       |              |                             | 0.38                      | 0.04             | 2              |
|                             | 5          | SSB, MC-ICP-MS       |              |                             | 0.35                      | 0.02             | 2              |
|                             | 6          | SSB, MC-ICP-MS       |              |                             | 0.34                      | 0.06             | 15             |
|                             | 7          | DS-TIMS <sup>d</sup> |              |                             | 0.36                      | 0.07             | 41             |
| 8                           | DS-TIMS    |                      |              | 0.35                        | 0.05                      | 38               |                |
| Seawater,<br>Atlantic       | This study |                      | 0.04         | 94800                       | 0.89                      | 0.05             | 10             |
|                             | 9          | SSB, MC-ICP-MS       |              |                             | 0.86                      | 0.08             | 6              |
|                             | 3          | SSB, MC-ICP-MS       |              |                             | 0.91                      | 0.07             | 4              |
| AGV-2,<br>Andesite,<br>USGS | This study |                      | 3.72         | 83100                       | 0.34                      | 0.04             | 12             |
|                             | 9          | SSB, MC-ICP-MS       |              |                             | 0.36                      | 0.05             | 4              |
|                             | 2          | SSB, MC-ICP-MS       |              |                             | 0.33                      | 0.04             | 6              |
|                             | 10         | SSB, MC-ICP-MS       |              |                             | 0.38                      | 0.08             | 3              |
|                             | 7          | DS-TIMS              |              |                             | 0.35                      | 0.04             | 3              |
|                             | 11         | DS-TIMS              |              |                             | 0.35                      | 0.05             | 8              |
|                             | 8          | DS-TIMS              |              |                             | 0.38                      | 0.04             | 9              |
|                             | 1          | SSB, MC-ICP-MS       |              |                             | 0.31                      | 0.05             | 3              |
| BCR-2,<br>Basalt,<br>USGS   | This study |                      | 5.09         | 113500                      | 0.39                      | 0.04             | 9              |
|                             | 2          | SSB, MC-ICP-MS       |              |                             | 0.38                      | 0.07             | 30             |
|                             | 5          | SSB, MC-ICP-MS       |              |                             | 0.40                      | 0.02             | 4              |
|                             | 4          | SSB, MC-ICP-MS       |              |                             | 0.34                      | 0.06             | 2              |
|                             | 10         | SSB, MC-ICP-MS       |              |                             | 0.42                      | 0.15             | 3              |
|                             | 9          | SSB, MC-ICP-MS       |              |                             | 0.39                      | 0.07             | 4              |
|                             | 3          | SSB, MC-ICP-MS       |              |                             | 0.41                      | 0.05             | 4              |
|                             | 10         | SSB, MC-ICP-MS       |              |                             | 0.42                      | 0.15             | 3              |
|                             | 7          | DS-TIMS              |              |                             | 0.38                      | 0.06             | 4              |
|                             | 11         | DS-TIMS              |              |                             | 0.40                      | 0.04             | 12             |
| 8                           | DS-TIMS    |                      |              | 0.39                        | 0.06                      | 24               |                |
| BHVO-2,<br>Basalt,          | This study |                      | 8.17         | 89000                       | 0.38                      | 0.05             | 9              |

|                                 |            |                |      |        |      |      |    |
|---------------------------------|------------|----------------|------|--------|------|------|----|
| Hawaiian,<br>USA                | 2          | SSB, MC-ICP-MS |      |        | 0.38 | 0.06 | 41 |
|                                 | 3          | SSB, MC-ICP-MS |      |        | 0.41 | 0.05 | 5  |
|                                 | 9          | SSB, MC-ICP-MS |      |        | 0.43 | 0.08 | 27 |
|                                 | 4          | SSB, MC-ICP-MS |      |        | 0.38 | 0.06 | 2  |
|                                 | 10         | SSB, MC-ICP-MS |      |        | 0.42 | 0.08 | 10 |
|                                 | 12         | DS-TIMS        |      |        | 0.44 | 0.05 | 5  |
|                                 | 7          | DS-TIMS        |      |        | 0.38 | 0.03 | 7  |
|                                 | 11         | DS-TIMS        |      |        | 0.39 | 0.05 | 16 |
|                                 | 8          | DS-TIMS        |      |        | 0.37 | 0.05 | 12 |
| GSP-2,<br>Granodiorite,<br>USGS | This study |                | 1.50 | 92800  | 0.35 | 0.05 | 12 |
|                                 | 9          | SSB, MC-ICP-MS |      |        | 0.40 | 0.10 | 5  |
|                                 | 2          | SSB, MC-ICP-MS |      |        | 0.33 | 0.03 | 5  |
|                                 | 7          | DS-TIMS        |      |        | 0.32 | 0.01 | 3  |
|                                 | 1          | SSB, MC-ICP-MS |      |        | 0.27 | 0.02 | 6  |
| JG-2,<br>Granite,<br>Japan      | This study |                | 0.51 | 108600 | 0.37 | 0.04 | 9  |
|                                 | 11         | DS-TIMS        |      |        | 0.31 | 0.06 | 3  |
| RGM-2,<br>Rhyolite,<br>USGS     | This study |                | 0.88 | 98300  | 0.42 | 0.05 | 7  |
|                                 | 11         | DS-TIMS        |      |        | 0.38 | 0.05 | 6  |
|                                 | 8          | DS-TIMS        |      |        | 0.39 | 0.13 | 3  |
|                                 | 9          | SSB, MC-ICP-MS |      |        | 0.44 | 0.04 | 4  |
| W-2a,<br>diabase,<br>USGS       | This study |                | 7.76 | 113400 | 0.40 | 0.07 | 9  |
|                                 | 11         | DS-TIMS        |      |        | 0.41 | 0.09 | 9  |
|                                 | 8          | DS-TIMS        |      |        | 0.34 | 0.08 | 3  |
|                                 | 13         | DS-TIMS        |      |        | 0.46 | 0.24 |    |
| DNC-1a,<br>dolerite,<br>USGS    | This study |                | 8.22 | 124600 | 0.40 | 0.03 | 8  |
|                                 | 2          | SSB, MC-ICP-MS |      |        | 0.41 | 0.03 | 4  |
|                                 | 3          | SSB, MC-ICP-MS |      |        | 0.40 | 0.05 | 4  |
|                                 | 4          | SSB, MC-ICP-MS |      |        | 0.38 | 0.04 | 2  |
|                                 | 11         | DS-TIMS        |      |        | 0.41 | 0.03 | 5  |
|                                 | 8          | DS-TIMS        |      |        | 0.40 | 0.04 | 9  |

<sup>a</sup> Measurement method include double spike TIMS method (DS-TIMS) and standard-sample standard bracketing MC-ICP-MS method (SSB, MC-ICP-MS);

<sup>b</sup> 2SD, 2 standard deviation;

<sup>c</sup> replicate was measured from independent digestion of the given sample;

<sup>d</sup> All the literature data were converted to the  $\delta^{44/42}\text{Ca}$  from  $\delta^{44/40}\text{Ca}$  by dividing 2.048, if only  $\delta^{44/40}\text{Ca}$  has been reported and the corresponding uncertainty is also divided by 2.0

## References

1. C. Chen, W. Dai, Z. Wang, Y. Liu, M. Li, H. Becker and S. F. Foley, *Geochimica et Cosmochimica Acta*, 2019, **249**, 121-137.
2. M. Li, Y. Lei, L. Feng, Z. Wang, N. S. Belshaw, Z. Hu, Y. Liu, L. Zhou, H. Chen and X. Chai, *Journal of Analytical Atomic Spectrometry*, 2018, **33**, 1707-1719.
3. L. Feng, L. Zhou, Y. Lu, W. Zhang, Q. Wang, S. Tong and Z. Hu, *Journal of Analytical Atomic Spectrometry*, 2018, **33**, 413-421.
4. M. Schiller, C. Paton and M. Bizzarro, *Journal of Analytical Atomic Spectrometry*, 2012, **27**, 38-49.
5. C. A. Colla, J. Wimpenny, Q.-Z. Yin, J. R. Rustad and W. H. Casey, *Geochimica Et Cosmochimica Acta*, 2013, **121**, 363-373.
6. K. Harouaka, M. Mansor, J. L. Macalady and M. S. Fantle, *Geochimica Et Cosmochimica Acta*, 2016, **184**, 114-131.
7. Y. He, Y. Wang, C. Zhu, S. Huang and S. Li, *Geostandards and Geoanalytical Research*, 2017, **41**, 283-302.
8. L.-p. Feng, L. Zhou, L. Yang, D. J. DePaolo, S.-Y. Tong, Y.-S. Liu, T. L. Owens and S. Gao, *Geostandards and Geoanalytical Research*, 2017, **41**, 93-106.
9. Z. Bao, C. Zong, K. Chen, N. Lv and H. Yuan, *International Journal of Mass Spectrometry*, 2020, **448**, 116268.
10. M. C. Valdes, M. Moreira, J. Foriel and F. Moynier, *Earth and Planetary Science Letters*, 2014, **394**, 135-145.
11. F. Liu, H. L. Zhu, X. Li, G. Q. Wang and Z. F. Zhang, *Geostandards and Geoanalytical Research*, 2017, **41**, 675-688.
12. T. Magna, N. Gussone and K. Mezger, *Earth and Planetary Science Letters*, 2015, **430**, 86-94.
13. M. Amini, A. Eisenhauer, F. Böhm, C. Holmden, K. Kreissig, F. Hauff and K. P. Jochum, *Geostandards and Geoanalytical Research*, 2009, **33**, 231-247.
